# Supplementary material for: DFT/TDDFT Study on the electronic structures and optoelectronic properties of several red-emitting osmium(ii) complexes with different P∧P ancillary ligands
Source: Royal Society of Chemistry journal article supplement (doi:10.1039/c1dt10279f), 2011-01-01
Supplement: c1dt10279f.pdf [file c1dt10279f.pdf]

## Supporting information

### DFT/TDDFT Study on the Electronic Structures and Optoelectronic Properties of Several Red-Emitting Osmium(II) Complexes with different P<sup>^</sup>P Ancillary Ligands

Juanjuan Su,<sup>1,3</sup> Lili Shi,<sup>1</sup> Xiaobo Sun,<sup>2</sup> Wei Guan,<sup>1</sup> Zhijian Wu,<sup>1,\*</sup>

<sup>1</sup> State Key Laboratory of Rare Earth Resource Utilization, Changchun Institute of Applied Chemistry, Chinese Academy of Sciences, Changchun 130022, P. R. China

<sup>2</sup> Department of Applied Chemistry, Qingdao Agricultural University, Qingdao 266109, P. R. China

<sup>3</sup> Graduate School, Chinese Academy of Sciences, Beijing 100049, P. R. China

\* Corresponding author: Zhijian Wu. E-mail: [zjwu@ciac.jl.cn](mailto:zjwu@ciac.jl.cn)

Table S1. Frontier molecular orbital energies (eV) and compositions (%) in the ground state for complex **1**.

| MO  | Energy/eV | Composition |                  |                               |                               | assign                               |
|-----|-----------|-------------|------------------|-------------------------------|-------------------------------|--------------------------------------|
|     |           | Os          | P <sup>^</sup> P | N <sup>^</sup> N <sub>1</sub> | N <sup>^</sup> N <sub>2</sub> |                                      |
| L+9 | 1.64      | 23.8        | 49.6             | 4.5                           | 4.8                           | d*(Os)+π*(P <sup>^</sup> P)          |
| L+8 | 1.60      | 1.6         | 13.7             | -2.4                          | -2.7                          | π*(P <sup>^</sup> P)                 |
| L+7 | 1.27      | 10.7        | 59.5             | 6.9                           | 6.9                           | d*(Os)+π*(P <sup>^</sup> P)          |
| L+6 | 1.07      | 10.0        | 28.1             | 0.8                           | 0.8                           | d*(Os)+π*(P <sup>^</sup> P)          |
| L+5 | 0.46      | 1.1         | 0.9              | 48.4                          | 49.3                          | π*(N <sup>^</sup> N)                 |
| L+4 | 0.42      | 0.4         | 1.5              | 49.2                          | 48.3                          | π*(N <sup>^</sup> N)                 |
| L+3 | -0.50     | 1.2         | 1.1              | 48.3                          | 48.8                          | π*(N <sup>^</sup> N)                 |
| L+2 | -0.57     | 0.0         | 0.1              | 49.8                          | 49.3                          | π*(N <sup>^</sup> N)                 |
| L+1 | -1.46     | 5.5         | 1.7              | 45.9                          | 46.1                          | π*(N <sup>^</sup> N)                 |
| L   | -1.65     | 0.8         | 0.7              | 48.9                          | 48.7                          | π*(N <sup>^</sup> N)                 |
| Gap |           |             |                  | 3.34                          |                               |                                      |
| H   | -4.99     | 67.1        | 3.5              | 14.5                          | 14.5                          | d(Os)+π(N <sup>^</sup> N)            |
| H-1 | -5.32     | 52.2        | 8.1              | 19.1                          | 19.1                          | d(Os)+π(N <sup>^</sup> N)            |
| H-2 | -5.41     | 62.4        | 9.2              | 14.5                          | 14.5                          | d(Os)+π(N <sup>^</sup> N)            |
| H-3 | -6.10     | 13.3        | 2.0              | 41.9                          | 42.4                          | d(Os)+π(N <sup>^</sup> N)            |
| H-4 | -6.17     | 12.3        | 1.5              | 43.5                          | 42.9                          | d(Os)+π(N <sup>^</sup> N)            |
| H-5 | -6.98     | 2.1         | 0.4              | 47.9                          | 49.5                          | π(N <sup>^</sup> N)                  |
| H-6 | -7.02     | 1.9         | 1.1              | 49.2                          | 47.8                          | π(N <sup>^</sup> N)                  |
| H-7 | -7.21     | 0.3         | 2.5              | 11.5                          | 85.4                          | π(N <sup>^</sup> N)                  |
| H-8 | -7.21     | 0.3         | 2.7              | 85.3                          | 11.3                          | π(N <sup>^</sup> N)                  |
| H-9 | -7.48     | 3.3         | 22.9             | 36.2                          | 36.4                          | π(N <sup>^</sup> N/P <sup>^</sup> P) |

Table S2. Frontier molecular orbital energies (eV) and compositions (%) in the ground state for complex **2**.

| MO  | Energy/eV | Composition |                  |                               |                               | Assign                                |
|-----|-----------|-------------|------------------|-------------------------------|-------------------------------|---------------------------------------|
|     |           | Os          | P <sup>^</sup> P | N <sup>^</sup> N <sub>1</sub> | N <sup>^</sup> N <sub>2</sub> |                                       |
| L+9 | 1.67      | 10.5        | 9.7              | 0.1                           | 0.1                           | d*(Os)+π*(P <sup>^</sup> P)           |
| L+8 | 1.51      | 7.3         | 14.3             | 9.8                           | 9.8                           | π*(P <sup>^</sup> P/N <sup>^</sup> N) |
| L+7 | 1.25      | 23.1        | 24.9             | 3.9                           | 3.9                           | d*(Os)+π*(P <sup>^</sup> P)           |
| L+6 | 0.41      | 1.1         | 0.7              | 48.9                          | 48.9                          | π*(N <sup>^</sup> N)                  |
| L+5 | 0.37      | 0.8         | 0.9              | 48.9                          | 48.9                          | π*(N <sup>^</sup> N)                  |
| L+4 | -0.53     | 0.1         | 95.6             | 2.2                           | 2.2                           | π*(P <sup>^</sup> P)                  |
| L+3 | -0.58     | 0.9         | 5.3              | 46.6                          | 46.6                          | π*(N <sup>^</sup> N)                  |
| L+2 | -0.65     | 0.1         | 0.3              | 49.5                          | 49.5                          | π*(N <sup>^</sup> N)                  |
| L+1 | -1.55     | 4.8         | 1.6              | 46.4                          | 46.4                          | π*(N <sup>^</sup> N)                  |
| L   | -1.70     | 1.1         | 0.7              | 48.7                          | 48.7                          | π*(N <sup>^</sup> N)                  |
| Gap |           |             |                  | 3.35                          |                               |                                       |
| H   | -5.05     | 65.3        | 4.2              | 15.1                          | 15.1                          | d(Os)+π(N <sup>^</sup> N)             |
| H-1 | -5.27     | 57.7        | 6.5              | 17.1                          | 17.1                          | d(Os)+π(N <sup>^</sup> N)             |
| H-2 | -5.63     | 58.6        | 9.3              | 16.0                          | 16.0                          | d(Os)+π(N <sup>^</sup> N)             |
| H-3 | -6.12     | 11.3        | 1.3              | 43.5                          | 43.5                          | d(Os)+π(N <sup>^</sup> N)             |
| H-4 | -6.24     | 15.8        | 2.3              | 40.9                          | 40.9                          | d(Os)+π(N <sup>^</sup> N)             |
| H-5 | -7.02     | 2.1         | 0.5              | 48.6                          | 48.7                          | π(N <sup>^</sup> N)                   |
| H-6 | -7.06     | 1.6         | 1.1              | 48.6                          | 48.6                          | π(N <sup>^</sup> N)                   |
| H-7 | -7.21     | 0.4         | 3.4              | 47.8                          | 47.8                          | π(N <sup>^</sup> N)                   |
| H-8 | -7.22     | 0.2         | 2.1              | 48.7                          | 48.7                          | π(N <sup>^</sup> N)                   |
| H-9 | -7.53     | 3.4         | 21.1             | 37.0                          | 37.0                          | π(N <sup>^</sup> N/P <sup>^</sup> P)  |

Table S3. Frontier molecular orbital energies (eV) and compositions (%) in the ground state for complex **3**.

| MO  | Energy/eV | Composition |                  |                               |                               | Assign                           |
|-----|-----------|-------------|------------------|-------------------------------|-------------------------------|----------------------------------|
|     |           | Os          | P <sup>^</sup> P | N <sup>^</sup> N <sub>1</sub> | N <sup>^</sup> N <sub>2</sub> |                                  |
| L+9 | 1.56      | 6.4         | 11.7             | 9.9                           | 9.9                           | $\pi^*(P^{\wedge}P/N^{\wedge}N)$ |
| L+8 | 1.29      | 23.9        | 28.2             | 4.3                           | 4.3                           | $d^*(Os)+\pi^*(P^{\wedge}P)$     |
| L+7 | 0.42      | 1.1         | 0.7              | 48.9                          | 48.9                          | $\pi^*(N^{\wedge}N)$             |
| L+6 | 0.38      | 0.8         | 1.0              | 48.8                          | 48.8                          | $\pi^*(N^{\wedge}N)$             |
| L+5 | -0.48     | 1.3         | 97.2             | 1.0                           | 1.0                           | $\pi^*(P^{\wedge}P)$             |
| L+4 | -0.56     | 0.2         | 79.6             | 10.1                          | 10.1                          | $\pi^*(P^{\wedge}P)$             |
| L+3 | -0.58     | 0.8         | 21.3             | 38.7                          | 38.7                          | $\pi^*(N^{\wedge}N/P^{\wedge}P)$ |
| L+2 | -0.64     | 0.1         | 1.4              | 48.9                          | 48.9                          | $\pi^*(N^{\wedge}N)$             |
| L+1 | -1.54     | 4.8         | 1.5              | 46.4                          | 46.4                          | $\pi^*(N^{\wedge}N)$             |
| L   | -1.70     | 1.1         | 0.9              | 48.7                          | 48.7                          | $\pi^*(N^{\wedge}N)$             |
| Gap |           |             |                  | 3.34                          |                               |                                  |
| H   | -5.04     | 65.3        | 4.4              | 15.0                          | 15.0                          | $d(Os)+\pi(N^{\wedge}N)$         |
| H-1 | -5.25     | 57.6        | 7.0              | 16.9                          | 16.9                          | $d(Os)+\pi(N^{\wedge}N)$         |
| H-2 | -5.61     | 59.2        | 9.6              | 15.6                          | 15.6                          | $d(Os)+\pi(N^{\wedge}N)$         |
| H-3 | -6.11     | 11.1        | 1.3              | 43.6                          | 43.6                          | $d(Os)+\pi(N^{\wedge}N)$         |
| H-4 | -6.23     | 15.2        | 2.4              | 41.1                          | 41.1                          | $d(Os)+\pi(N^{\wedge}N)$         |
| H-5 | -7.01     | 2.0         | 0.6              | 48.6                          | 48.6                          | $\pi(N^{\wedge}N)$               |
| H-6 | -7.05     | 1.5         | 1.4              | 48.5                          | 48.5                          | $\pi(N^{\wedge}N)$               |
| H-7 | -7.19     | 0.4         | 8.0              | 45.5                          | 45.5                          | $\pi(N^{\wedge}N)$               |
| H-8 | -7.20     | 0.2         | 2.3              | 48.6                          | 48.6                          | $\pi(N^{\wedge}N)$               |
| H-9 | -7.36     | 0.1         | 93.7             | 3.1                           | 3.1                           | $\pi(P^{\wedge}P)$               |

Table S4. Frontier molecular orbital energies (eV) and compositions (%) in the ground state for complex **4**.

| MO  | Energy/eV | Composition |                  |                               |                               | Assign                      |
|-----|-----------|-------------|------------------|-------------------------------|-------------------------------|-----------------------------|
|     |           | Os          | P <sup>^</sup> P | N <sup>^</sup> N <sub>1</sub> | N <sup>^</sup> N <sub>2</sub> |                             |
| L+9 | 1.30      | 24.0        | 28.6             | 4.3                           | 4.3                           | d*(Os)+π*(P <sup>^</sup> P) |
| L+8 | 0.68      | 0.7         | 97.6             | 0.8                           | 0.8                           | π*(P <sup>^</sup> P)        |
| L+7 | 0.42      | 1.1         | 0.7              | 48.9                          | 48.9                          | π*(N <sup>^</sup> N)        |
| L+6 | 0.38      | 0.7         | 1.8              | 48.5                          | 48.5                          | π*(N <sup>^</sup> N)        |
| L+5 | -0.57     | 0.9         | 3.7              | 47.4                          | 47.4                          | π*(N <sup>^</sup> N)        |
| L+4 | -0.61     | 0.1         | 97.2             | 1.3                           | 1.3                           | π*(P <sup>^</sup> P)        |
| L+3 | -0.64     | 0.1         | 0.4              | 49.4                          | 49.4                          | π*(N <sup>^</sup> N)        |
| L+2 | -1.37     | 1.2         | 97.2             | 1.0                           | 1.0                           | π*(P <sup>^</sup> P)        |
| L+1 | -1.54     | 4.8         | 1.4              | 46.4                          | 46.4                          | π*(N <sup>^</sup> N)        |
| L   | -1.70     | 0.9         | 2.6              | 47.9                          | 47.9                          | π*(N <sup>^</sup> N)        |
| Gap |           |             |                  | 3.34                          |                               |                             |
| H   | -5.04     | 65.3        | 4.6              | 14.9                          | 14.9                          | d(Os)+π(N <sup>^</sup> N)   |
| H-1 | -5.25     | 57.5        | 7.3              | 16.8                          | 16.8                          | d(Os)+π(N <sup>^</sup> N)   |
| H-2 | -5.61     | 59.3        | 9.6              | 15.5                          | 15.5                          | d(Os)+π(N <sup>^</sup> N)   |
| H-3 | -6.11     | 11.0        | 1.3              | 43.7                          | 43.6                          | d(Os)+π(N <sup>^</sup> N)   |
| H-4 | -6.22     | 14.5        | 5.4              | 40.0                          | 40.0                          | d(Os)+π(N <sup>^</sup> N)   |
| H-5 | -6.36     | 0.8         | 96.6             | 1.3                           | 1.3                           | π(P <sup>^</sup> P)         |
| H-6 | -7.01     | 2.1         | 0.6              | 48.6                          | 48.6                          | π(N <sup>^</sup> N)         |
| H-7 | -7.05     | 1.5         | 3.0              | 47.7                          | 47.7                          | π(N <sup>^</sup> N)         |
| H-8 | -7.12     | 0.1         | 82.5             | 8.6                           | 8.6                           | π(P <sup>^</sup> P)         |
| H-9 | -7.20     | 0.2         | 2.1              | 49.0                          | 48.3                          | π(N <sup>^</sup> N)         |

Table S5. Frontier molecular orbital energies (eV) and compositions (%) in the ground state for complex **5**.

| MO  | Energy/eV | Composition |                  |                               |                               | Assign                      |
|-----|-----------|-------------|------------------|-------------------------------|-------------------------------|-----------------------------|
|     |           | Os          | P <sup>^</sup> P | N <sup>^</sup> N <sub>1</sub> | N <sup>^</sup> N <sub>2</sub> |                             |
| L+9 | 1.05      | 24.7        | 35.1             | 4.6                           | 5.0                           | d*(Os)+π*(P <sup>^</sup> P) |
| L+8 | 1.03      | 2.3         | 94.8             | 1.0                           | 0.3                           | π*(P <sup>^</sup> P)        |
| L+7 | 0.26      | 1.0         | 0.8              | 38.1                          | 59.7                          | π*(N <sup>^</sup> N)        |
| L+6 | 0.22      | 0.9         | 1.1              | 59.5                          | 38.0                          | π*(N <sup>^</sup> N)        |
| L+5 | -0.74     | 0.9         | 1.2              | 41.1                          | 56.3                          | π*(N <sup>^</sup> N)        |
| L+4 | -0.80     | 0.1         | 0.8              | 56.7                          | 41.7                          | π*(N <sup>^</sup> N)        |
| L+3 | -1.02     | 1.0         | 98.3             | 0.5                           | 0.5                           | π*(P <sup>^</sup> P)        |
| L+2 | -1.67     | 0.7         | 93.7             | 4.9                           | 0.7                           | π*(P <sup>^</sup> P)        |
| L+1 | -1.72     | 4.3         | 6.1              | 39.6                          | 49.1                          | π*(N <sup>^</sup> N)        |
| L   | -1.88     | 0.9         | 2.3              | 50.8                          | 45.3                          | π*(N <sup>^</sup> N)        |
| Gap |           |             |                  | 3.42                          |                               |                             |
| H   | -5.30     | 64.1        | 4.4              | 15.3                          | 15.8                          | d(Os)+π(N <sup>^</sup> N)   |
| H-1 | -5.49     | 55.2        | 7.2              | 18.2                          | 17.7                          | d(Os)+π(N <sup>^</sup> N)   |
| H-2 | -5.87     | 56.4        | 9.3              | 17.0                          | 17.2                          | d(Os)+π(N <sup>^</sup> N)   |
| H-3 | -6.30     | 12.4        | 1.5              | 42.1                          | 43.6                          | d(Os)+π(N <sup>^</sup> N)   |
| H-4 | -6.43     | 17.8        | 2.8              | 40.5                          | 38.9                          | d(Os)+π(N <sup>^</sup> N)   |
| H-5 | -7.18     | 2.3         | 0.6              | 44.5                          | 52.5                          | d(Os)+π(N <sup>^</sup> N)   |
| H-6 | -7.22     | 1.6         | 0.9              | 52.7                          | 44.7                          | π(N <sup>^</sup> N)         |
| H-7 | -7.38     | 0.4         | 3.3              | 79.7                          | 16.1                          | π(N <sup>^</sup> N)         |
| H-8 | -7.39     | 0.2         | 2.3              | 16.9                          | 80.2                          | π(N <sup>^</sup> N)         |
| H-9 | -7.68     | 0.1         | 97.0             | 1.3                           | 1.6                           | π(P <sup>^</sup> P)         |

Table S6. Selected calculated wavelength (nm) /energies (eV), oscillator strength (f), major contribution, and transition characters of complexes **1-5**.

|                 | State           | $\lambda/E$ | Oscillator  | Configuration                                  | Nature                                                                           | Exptl <sup>[23]</sup> |
|-----------------|-----------------|-------------|-------------|------------------------------------------------|----------------------------------------------------------------------------------|-----------------------|
| 1               | S <sub>1</sub>  | 523/2.37    | 0.0155      | H→L(69%)                                       | MLCT/ILCT[d(Os)+π(N <sup>^</sup> N)→π*(N <sup>^</sup> N)]                        |                       |
|                 | S <sub>4</sub>  | 433/2.86    | 0.0819      | H-2→L(55%)                                     | MLCT/LLCT[d(Os)+π(P <sup>^</sup> P)→π*(N <sup>^</sup> N)]                        |                       |
|                 |                 |             |             | H-1→L+1(41%)                                   | MLCT/ILCT[d(Os)+π(N <sup>^</sup> N)→π*(N <sup>^</sup> N)]                        |                       |
|                 |                 |             |             | H-1→L+1(55%)                                   | MLCT/ILCT[d(Os)+π(N <sup>^</sup> N)→π*(N <sup>^</sup> N)]                        |                       |
|                 | S <sub>5</sub>  | 423/2.93    | 0.1807      | H-1→L+1(55%)                                   | MLCT/ILCT[d(Os)+π(N <sup>^</sup> N)→π*(N <sup>^</sup> N)]                        |                       |
|                 | S <sub>6</sub>  | 387/3.20    | 0.1625      | H-2→L+1(65%)                                   | MLCT/LLCT[d(Os)+π(P <sup>^</sup> P)→π*(N <sup>^</sup> N)]                        |                       |
|                 | S <sub>10</sub> | 326/3.80    | 0.1281      | H-4→L(59%)                                     | ILCT/MLCT[π(N <sup>^</sup> N)+d(Os)→π*(N <sup>^</sup> N)]                        |                       |
|                 | S <sub>14</sub> | 307/4.03    | 0.0752      | H-1→L+3(65%)                                   | MLCT/ILCT[d(Os)+π(N <sup>^</sup> N)→π*(N <sup>^</sup> N)]                        |                       |
|                 | S <sub>15</sub> | 304/4.08    | 0.2543      | H-1→L+2(52%)                                   | MLCT/ILCT[d(Os)+π(N <sup>^</sup> N)→π*(N <sup>^</sup> N)]                        |                       |
|                 | S <sub>16</sub> | 297/4.18    | 0.3135      | H-2→L+3(60%)                                   | MLCT/IL/LLCT[d(Os)+π(N <sup>^</sup> N)+π(P <sup>^</sup> P)→π*(N <sup>^</sup> N)] |                       |
|                 | S <sub>23</sub> | 263/4.72    | 0.0741      | H-3→L+2(45%)                                   | ILCT/MLCT[π(N <sup>^</sup> N)+d(Os)→π*(N <sup>^</sup> N)]                        |                       |
|                 | S <sub>42</sub> | 235/5.27    | 0.1266      | H-9→L+1(45%)                                   | LLCT/LM/ILC[π(P <sup>^</sup> P)+π(N <sup>^</sup> N)→d(Os)+π*(N <sup>^</sup> N)]  |                       |
|                 | S <sub>43</sub> | 233/5.33    | 0.1427      | H-13→L(37%)                                    | ILCT[π(N <sup>^</sup> N)→π*(N <sup>^</sup> N)]                                   |                       |
|                 | S <sub>45</sub> | 232/5.34    | 0.1164      | H-12→L(45%)                                    | ILCT/LLCT[π(N <sup>^</sup> N)+π(P <sup>^</sup> P)→π*(N <sup>^</sup> N)]          |                       |
|                 | S <sub>57</sub> | 217/5.71    | 0.2250      | H-3→L+4(42%)                                   | MLCT/ILCT[d(Os)+π(N <sup>^</sup> N)→π*(N <sup>^</sup> N)]                        |                       |
|                 | S <sub>58</sub> | 216/5.74    | 0.1564      | H-15→L(36%)                                    | ILCT/MLCT[π(N <sup>^</sup> N+d(Os))→π*(N <sup>^</sup> N)]                        |                       |
|                 |                 |             |             | H-3→L+5(36%)                                   | MLCT/ILCT[d(Os)+π(N <sup>^</sup> N)→π*(N <sup>^</sup> N)]                        |                       |
|                 |                 |             |             | H-4→L+5(31%)                                   | ILCT/MLCT [π(N <sup>^</sup> N +d(Os))→π*(N <sup>^</sup> N)]                      |                       |
| 2               | S <sub>1</sub>  | 512/2.42    | 0.0238      | H→L(69%)                                       | MLCT/ILCT[d(Os)+π(N <sup>^</sup> N)→π*(N <sup>^</sup> N)]                        |                       |
|                 | S <sub>5</sub>  | 404/3.07    | 0.2015      | H-2→L(68%)                                     | MLCT[d(Os)→π*(N <sup>^</sup> N)]                                                 |                       |
|                 | S <sub>6</sub>  | 373/3.32    | 0.1337      | H-2→L+1(66%)                                   | MLCT[d(Os)→π*(N <sup>^</sup> N)]                                                 |                       |
|                 | S <sub>11</sub> | 324/3.83    | 0.1823      | H-4→L(61%)                                     | MLCT/ILCT[d(Os)+π(N <sup>^</sup> N)→π*(N <sup>^</sup> N)]                        |                       |
|                 | S <sub>17</sub> | 294/4.21    | 0.2475      | H-2→L+2(65%)                                   | MLCT/ILCT[d(Os)+π(N <sup>^</sup> N)→π*(N <sup>^</sup> N)]                        |                       |
|                 | S <sub>19</sub> | 288/4.31    | 0.2634      | H-2→L+3(63%)                                   | MLCT/ ILCT [d(Os) +π(N <sup>^</sup> N) →π*(N <sup>^</sup> N)]                    |                       |
|                 | S <sub>45</sub> | 234/5.30    | 0.1324      | H-2→L+5(37%)                                   | MLCT/ILCT[d(Os)+π(N <sup>^</sup> N)→π*(N <sup>^</sup> N)]                        |                       |
|                 | S <sub>47</sub> | 233/5.33    | 0.1038      | H-12→L(34%)                                    | MLCT/ILCT[d(Os)+π(N <sup>^</sup> N)→π*(N <sup>^</sup> N)]                        |                       |
|                 | S <sub>48</sub> | 233/5.33    | 0.1280      | H-11→L(35%)                                    | LLCT[π(P <sup>^</sup> P)→π*(N <sup>^</sup> N)]                                   |                       |
|                 | S <sub>57</sub> | 221/5.61    | 0.1956      | H-16→L(33%)                                    | LLCT/ILCT[π(P <sup>^</sup> P)+π(N <sup>^</sup> N) →π*(N <sup>^</sup> N)]         |                       |
|                 | S <sub>59</sub> | 218/5.69    | 0.0755      | H-16→L+1(38%)                                  | LLCT/LMCT[π(P <sup>^</sup> P)+π(N <sup>^</sup> N)→π*(N <sup>^</sup> N)+d(Os)]    |                       |
|                 |                 |             |             | H-14→L+1(36%)                                  | LLCT/ILCT[π(P <sup>^</sup> P)+π(N <sup>^</sup> N)→π*(N <sup>^</sup> N)]          |                       |
|                 |                 |             |             | H-15→L(43%)                                    | LLCT/ILCT[π(P <sup>^</sup> P)+π(N <sup>^</sup> N)→π*(N <sup>^</sup> N)]          |                       |
|                 | S <sub>60</sub> | 217/5.72    | 0.1365      | H-3→L+5(37%)                                   | MLCT/ILCT[d(Os)+π(N <sup>^</sup> N)→π*(N <sup>^</sup> N)]                        |                       |
| 3               | S <sub>1</sub>  | 511/2.43    | 0.0229      | H→L(69%)                                       | MLCT/ILCT[d(Os)+π(N <sup>^</sup> N)→π*(N <sup>^</sup> N)]                        |                       |
|                 | S <sub>5</sub>  | 404/3.07    | 0.1985      | H-2→L(68%)                                     | MLCT[d(Os)→π*(N <sup>^</sup> N)]                                                 | 418                   |
|                 | S <sub>6</sub>  | 374/3.32    | 0.1634      | H-2→L+1(66%)                                   | MLCT[d(Os)→π*(N <sup>^</sup> N)]                                                 | 356                   |
|                 | S <sub>10</sub> | 324/3.82    | 0.1765      | H-4→L(61%)                                     | MLCT/ILCT[d(Os)+π(N <sup>^</sup> N)→π*(N <sup>^</sup> N)]                        | 342                   |
|                 | S <sub>18</sub> | 294/4.21    | 0.2446      | H-2→L+2(65%)                                   | MLCT/ ILCT [d(Os) +π(N <sup>^</sup> N) →π*(N <sup>^</sup> N)]                    |                       |
|                 | S <sub>19</sub> | 294/4.22    | 0.1003      | H-1→L+5(68%)                                   | MLCT/LLCT[d(Os)+π(N <sup>^</sup> N)→π*(P <sup>^</sup> P)]                        |                       |
|                 | S <sub>20</sub> | 288/4.31    | 0.2463      | H-2→L+3(63%)                                   | MLCT/ ILCT [d(Os) +π(N <sup>^</sup> N) →π*(N <sup>^</sup> N)]                    | 307                   |
|                 | S <sub>28</sub> | 263/4.71    | 0.0933      | H-3→L+2(39%)                                   | MLCT/ILCT[d(Os)+π(N <sup>^</sup> N)→π*(N <sup>^</sup> N)]                        |                       |
|                 |                 |             |             | H→L+7(32%)                                     | MLCT/ILCT[d(Os)+π(N <sup>^</sup> N)→π*(N <sup>^</sup> N)]                        |                       |
|                 |                 |             |             | H-2→L+6(31%)                                   | MLCT/ILCT[d(Os)+π(N <sup>^</sup> N)→π*(N <sup>^</sup> N)]                        |                       |
|                 | S <sub>53</sub> | 234/5.30    | 0.1944      | H-13→L(28%)                                    | MLCT/ILCT[d(Os)+π(N <sup>^</sup> N)→π*(N <sup>^</sup> N)]                        |                       |
|                 |                 |             |             | H-12→L(28%)                                    | MLCT/ILCT[d(Os)+π(N <sup>^</sup> N)→π*(N <sup>^</sup> N)]                        |                       |
|                 |                 |             |             | H-11→L(21%)                                    | LLCT/MLCT[π(P <sup>^</sup> P)+d(Os)→π*(N <sup>^</sup> N)]                        |                       |
| S <sub>54</sub> | 233/5.32        | 0.1745      | H-11→L(21%) | LLCT[π(P <sup>^</sup> P)→π*(N <sup>^</sup> N)] |                                                                                  |                       |
| 4               | S <sub>1</sub>  | 511/2.43    | 0.0223      | H→L(69%)                                       | MLCT/ILCT[d(Os)+π(N <sup>^</sup> N)→π*(N <sup>^</sup> N)]                        |                       |
|                 | S <sub>5</sub>  | 404/3.07    | 0.1970      | H-2→L(68%)                                     | MLCT[d(Os)→π*(N <sup>^</sup> N)]                                                 |                       |

|   |                 |          |        |               |                                                                                |
|---|-----------------|----------|--------|---------------|--------------------------------------------------------------------------------|
|   | S <sub>7</sub>  | 375/3.31 | 0.2387 | H-2→L+1(63%)  | MLCT[d(Os)→π*(N <sup>^</sup> N)]                                               |
|   | S <sub>13</sub> | 325/3.82 | 0.1770 | H-5→L(56%)    | MLCT/ILCT[d(Os)+π(N <sup>^</sup> N)→π*(N <sup>^</sup> N)]                      |
|   | S <sub>22</sub> | 294/4.22 | 0.2439 | H-2→L+3(65%)  | MLCT/ILCT[d(Os)+π(N <sup>^</sup> N)→π*(N <sup>^</sup> N)]                      |
|   | S <sub>23</sub> | 288/4.31 | 0.3683 | H-2→L+4(64%)  | MLCT/ILCT[d(Os)+π(N <sup>^</sup> N)→π*(N <sup>^</sup> N)]                      |
|   | S <sub>34</sub> | 263/4.71 | 0.1294 | H-3→L+3(38%)  | MLCT/ILCT[d(Os)+π(N <sup>^</sup> N)→π*(N <sup>^</sup> N)]                      |
|   |                 |          |        | H→L+7(35%)    | MLCT/ILCT[d(Os)+π(N <sup>^</sup> N)→π*(N <sup>^</sup> N)]                      |
|   | S <sub>46</sub> | 248/5.01 | 0.1115 | H-1→L+6(40%)  | MLCT/ILCT[d(Os)+π(N <sup>^</sup> N)→π*(N <sup>^</sup> N)]                      |
|   |                 |          |        | H-1→L+9(31%)  | MC(d-d)/IL/LLCT[π(N <sup>^</sup> N)→π*(N <sup>^</sup> N)+π*(P <sup>^</sup> P)] |
|   | S <sub>59</sub> | 234/5.31 | 0.1342 | H-2→L+6(33%)  | MLCT/ILCT[d(Os)+π(N <sup>^</sup> N)→π*(N <sup>^</sup> N)]                      |
|   |                 |          |        | H→L+7(28%)    | MLCT/LLCT[d(Os)+π(N <sup>^</sup> N)→π*(P <sup>^</sup> P)]                      |
|   |                 |          |        | H-2→L+9(24%)  | MLCT[d(Os)→π*(P <sup>^</sup> P)]                                               |
|   | S <sub>60</sub> | 233/5.31 | 0.3717 | H-12→L(27%)   | LLCT/ILCT[π(P <sup>^</sup> P)+π(N <sup>^</sup> N)→π*(N <sup>^</sup> N)]        |
|   |                 |          |        | H-2→L+7(26%)  | MLCT/ILCT[d(Os)+π(N <sup>^</sup> N)→π*(N <sup>^</sup> N)]                      |
| 5 | S <sub>1</sub>  | 494/2.51 | 0.0254 | H→L(69%)      | MLCT/ILCT[d(Os)+π(N <sup>^</sup> N)→π*(N <sup>^</sup> N)]                      |
|   | S <sub>7</sub>  | 393/3.15 | 0.1922 | H-2→L(67%)    | MLCT/ILCT[d(Os)+π(N <sup>^</sup> N)→π*(N <sup>^</sup> N)]                      |
|   | S <sub>8</sub>  | 365/3.39 | 0.1564 | H-2→L+1(66%)  | MLCT[d(Os)→π*(N <sup>^</sup> N)]                                               |
|   | S <sub>14</sub> | 323/3.83 | 0.1909 | H-4→L(62%)    | MLCT/ILCT[d(Os)+π(N <sup>^</sup> N)→π*(N <sup>^</sup> N)]                      |
|   | S <sub>23</sub> | 288/4.30 | 0.2334 | H-2→L+4(66%)  | MLCT/ILCT[d(Os)+π(N <sup>^</sup> N)→π*(N <sup>^</sup> N)]                      |
|   | S <sub>24</sub> | 283/4.38 | 0.3044 | H-2→L+5(64%)  | MLCT/ILCT[d(Os)+π(N <sup>^</sup> N)→π*(N <sup>^</sup> N)]                      |
|   | S <sub>52</sub> | 235/5.27 | 0.0703 | H-7→L+2(60%)  | LLCT[π(N <sup>^</sup> N)→π*(P <sup>^</sup> P)]                                 |
|   | S <sub>54</sub> | 233/5.31 | 0.2069 | H-10→L(41%)   | LLCT/ILCT[π(P <sup>^</sup> P)+π(N <sup>^</sup> N)→π*(N <sup>^</sup> N)]        |
|   | S <sub>55</sub> | 233/5.32 | 0.0824 | H-1→L+17(30%) | LMCT[π*(N <sup>^</sup> N)→d(Os)]                                               |
|   |                 |          |        | H-1→L+13(25%) | MLCT[d(Os)→π*(N <sup>^</sup> N)]                                               |
|   |                 |          |        | H-1→L+11(22%) | MLCT/LLCT[d(Os)+π(N <sup>^</sup> N)→π*(P <sup>^</sup> P)]                      |
|   | S <sub>56</sub> | 233/5.33 | 0.1455 | H-12→L(29%)   | MLCT/ILCT[d(Os)+π(N <sup>^</sup> N)→π*(N <sup>^</sup> N)]                      |
|   |                 |          |        | H-8→L+2(25%)  | LLCT[π(N <sup>^</sup> N)→π*(P <sup>^</sup> P)]                                 |
|   |                 |          |        | H-5→L+4(20%)  | ILCT[π(N <sup>^</sup> N)→π*(N <sup>^</sup> N)]                                 |
|   | S <sub>58</sub> | 231/5.36 | 0.2027 | H-2→L+7(55%)  | MLCT/ILCT[d(Os)+π(N <sup>^</sup> N)→π*(N <sup>^</sup> N)]                      |
